# Supplementary material
Source: publisher figshare collection journal article supplement (https://brill.figshare.com/articles/dataset/_/15141183)
Supplement: Supplementary file 1 [file 1]

# **Factors Influencing the Use of Animal Models in Animal Experimentation: A Survey**

*Marta Borge* | ORCID: 0000-0001-7496-6383

Center for Behavioural Sciences and Mental Health, Istituto Superiore di Sanità, Viale

Regina Elena 299, 00160 Rome, Italy

[marta.borge@iss.it](mailto:marta.borge@iss.it)

*Laura Fasano* | ORCID: 0000-0003-4713-0462

Center for Behavioural Sciences and Mental Health, Istituto Superiore di Sanità, Viale

Regina Elena 299, 00160 Rome, Italy

[laura.fasano@uniroma1.it](mailto:laura.fasano@uniroma1.it)

*Sara Laurenzano* | ORCID: 0000-0002-2967-3642

Center for Behavioural Sciences and Mental Health, Istituto Superiore di Sanità, Viale

Regina Elena 299, 00160 Rome, Italy

[sara.laurenzano@yahoo.it](mailto:sara.laurenzano@yahoo.it)

*Augusto Vitale* | ORCID: 0000-0001-8078-3831

Corresponding author,

Center for Behavioural Sciences and Mental Health, Istituto Superiore di Sanità, Viale  
Regina Elena 299, 00160 Rome, Italy

[augusto.vitale@iss.it](mailto:augusto.vitale@iss.it)

**Supplementary Material**
